# Supplementary material for: [3]Rotaxane synthesized via covalent bond formation can recognize cations forming a sandwich structure
Source: Royal Society of Chemistry journal article supplement (doi:10.1039/b413715a), 2004-12-15
Supplement: b413715a.pdf [file b413715a.pdf]

# Supplementary Material (ESI) for Chemical Communications  
# This journal is © The Royal Society of Chemistry 2005

*Electronic Supplemental Information*

Title: [3]Rotaxane synthesized via covalent bond formation can recognize cations forming a sandwich structure

Authors: Yoshinobu Nagawa,\* Jun-ichi Suga, Kazuhisa Hiratani,\* Emiko Koyama and Masatoshi Kanesato

Content

Synthesis of bridged crownophane **2**, [3]rotaxane **3**, and [2]rotaxane **4**, and <sup>1</sup>H NMR, IR, and ESI-MS spectroscopic data for compounds, **2 - 4**.

Fluorescence spectra of **3** with cesium ion.

# Supplementary Material (ESI) for Chemical Communications

# This journal is © The Royal Society of Chemistry 2005

*Synthesis of bridged Crownophane 2:* To 25 ml of THF solution of crownophane **1** (300 mg, 0.52 mmol), potassium t-butoxide (64 mg, 0.57 mmol) was added and stirred for 5 h at room temperature. The solution became turbid gradually. After 50 ml of THF were added to it, 1,3-diphenylenediacetic acid dichloride (60 mg, 0.26 mmol) was then added to make the mixture clear at once. The solution was stirred overnight at room temperature. After the solvent was removed by evaporation, the residue was extracted with chloroform and the chloroform layer was washed with water and dried over anhydrous magnesium sulfate. The solvent was removed and the residue was subjected to a preparative GPC with chloroform as an eluent to give 0.12 g of bridged crownophane **2** together with the reactant (**1**).

**Compound 2:** yield 35.1 %;  $^1\text{H NMR}$  (500.1 MHz,  $\text{CDCl}_3$ , ppm): 3.47- 4.29 (40H, -O-CH<sub>2</sub>CH<sub>2</sub>-O-), 3.82, 3.94 (8H, ArCH<sub>2</sub>C=CH<sub>2</sub>), 4.48, 4.58 (4H, H<sub>2</sub>C=C), 3.73, 3.81 (4H, Ar-CH<sub>2</sub>-CO), 7.09 - 7.85 (26H, Ar-H and OH).

IR (KBr,  $\text{cm}^{-1}$ ): 3448, 2922, 1760, 1626, 1118, 743.

ESI mass ( $\text{CH}_3\text{CN}$ ): calcd for  $\text{C}_{78}\text{H}_{82}\text{O}_{18}$  1307.47, found 1329.8 (+Na<sup>+</sup>).

*Synthesis of [3]rotaxane 3 via covalent bond formation:* To the solution of 120 mg (0.09 mmol) of **2** in 5 ml of dimethylformamide(DMF), 95 mg (0.46 mmol) of 9-aminomethylantracene was added. Then the solution was stirred at room temperature for 5 days. After DMF was evaporated under vacuum by Kugelrohr apparatus, the residue was subjected to a preparative GPC with chloroform as an eluent to give [3]rotaxane **3** and [2]rotaxane **4**.

**Compound 3:** yield 20.3 %;  $^1\text{H NMR}$  (500.1 MHz,  $\text{CD}_2\text{Cl}_2:\text{CD}_3\text{CN}=9:1$ , ppm): Assignments were performed by several two dimensional NMR techniques such as DQF-COSY, NOESY, HMQC, and HMBC. 2.39, 2.79, 2.87, 3.12, 3.41, 3.48, 3.83, 4.01, 4.15 (40H, -O-CH<sub>2</sub>CH<sub>2</sub>-O-), 3.69 (4H, Ar-CH<sub>2</sub>-CO), 3.91, 3.98 (8H, ArCH<sub>2</sub>C=CH<sub>2</sub>), 3.93 (4H, H<sub>2</sub>C=C), 5.13 (4H, Ar-CH<sub>2</sub>-NH), 6.91, 7.10, 7.24, 7.29, 7.31, 7.34, 7.50, 7.61, 7.86, 7.87, 8.27, 8.30 (42H, Ar-H). 7.58 (2H, NH), 8.59 (4H, OH)  
IR (KBr,  $\text{cm}^{-1}$ ): 3393, 2924, 1647, 1524, 1110, 739.

# Supplementary Material (ESI) for Chemical Communications

# This journal is © The Royal Society of Chemistry 2005

ESI mass (CH<sub>3</sub>CN): calcd for C<sub>108</sub>H<sub>108</sub>N<sub>2</sub>O<sub>18</sub> 1722.02, found 1745.6 (+Na<sup>+</sup>).

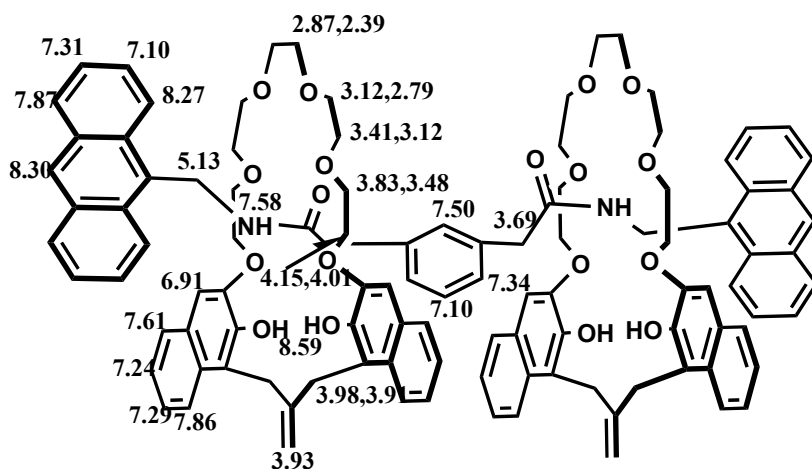

**Compound 4:** yield 25.9 %; <sup>1</sup>H NMR (500.1 MHz, CD<sub>2</sub>Cl<sub>2</sub>:CD<sub>3</sub>CN=9:1, ppm): Assignments were performed by several two dimensional NMR techniques such as DQF-COSY, NOESY, HMQC, and HMBC. 2.69, 2.81, 3.05, 3.10, 3.44 (20H, -O-CH<sub>2</sub>CH<sub>2</sub>-O-), 3.27 (4H, ArCH<sub>2</sub>-CO), 3.79 (4H, ArCH<sub>2</sub>C=CH<sub>2</sub>), 3.91 (2H, H<sub>2</sub>C=C), 5.24 (4H, Ar-CH<sub>2</sub>-NH), 6.43, 6.80, 6.92, 7.23, 7.24, 7.30, 7.44, 7.50, 7.53, 7.90, 8.03, 8.27, 8.46 (32H, Ar-H), 7.10 (2H, NH), 8.12 (2H, OH).

IR (KBr, cm<sup>-1</sup>): 3418, 2922, 1647, 1114, 737.

ESI mass (CH<sub>3</sub>CN): calcd for C<sub>74</sub>H<sub>70</sub>N<sub>2</sub>O<sub>10</sub> 1147.36, found 1170.1 (+Na<sup>+</sup>).

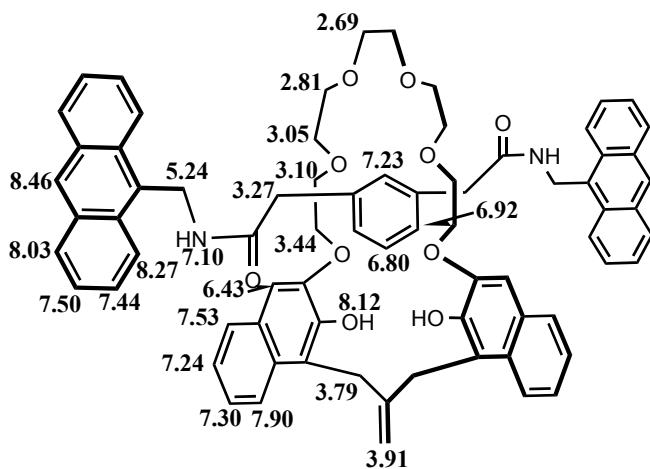

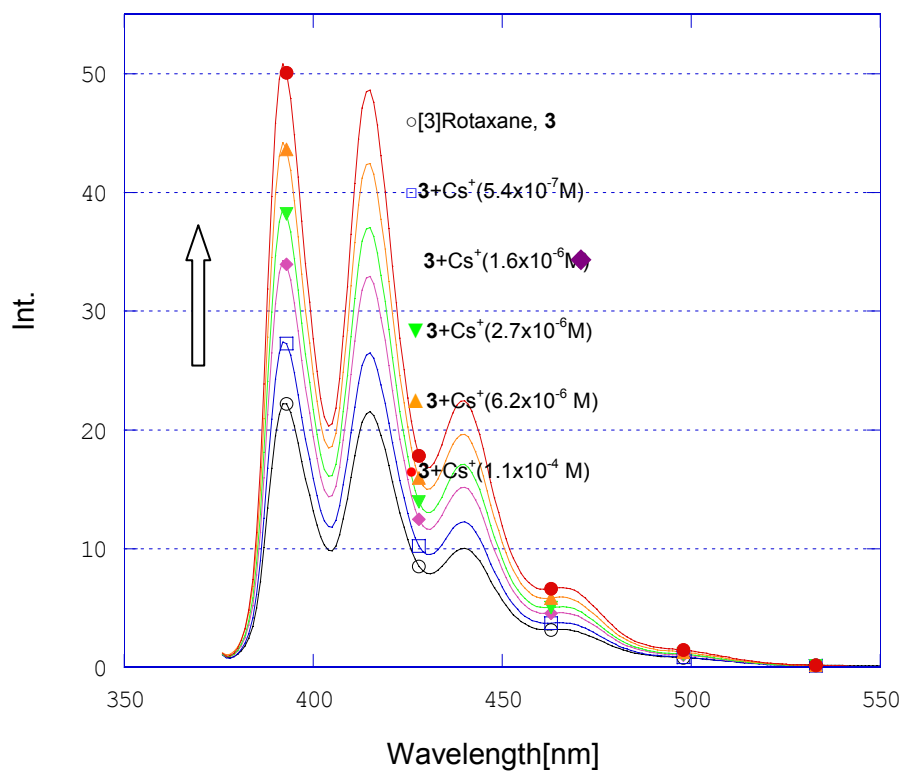

Figure 1 Fluorescence spectra of **3** ( $2.2 \times 10^{-6}$  M) in  $\text{CH}_2\text{Cl}_2/\text{CH}_3\text{CN}$  (9:1) with cesium ion; excitation wavelength = 285 nm.
